# Supplementary material for: PAX3-FOXO1 Induces Cannabinoid Receptor 1 to Enhance Cell Invasion and Metastasis
Source: Oxford University Press journal article supplement (doi:10.1158/0008-5472.can-11-0924), 2011-10-28
Supplement: 00085472can110924-sup-figure_1_caption_pdf_34k.pdf [file 00085472can110924-sup-figure_1_caption_pdf_34k.pdf]

Supplementary Figure 1: Expression levels of ectopically expressed proteins

(A) Western blot showing exogenous expression of PAX3 and PAX3-FOXO1 (PF) from MSCV-IRES-GFP and MSCV-SV40-Puro retroviral vectors as detected by anti-PAX3 antibody. An anti-Pan actin blot is provided for a loading control. (B) (i) Exogenous expression of PAX3 and PAX3-FOXO1 (PF) in wild type (WT) and Cb1<sup>-/-</sup> primary myoblasts as detected with the anti-PAX3 antibody. Pan-actin is provided as a loading control. (ii) Real time PCR for Cnr1 mRNA expression in wild type (WT) and Cb1<sup>-/-</sup> primary myoblasts, normalized to GAPDH. (C) Real time PCR for Cnr1 mRNA expression comparing the relative expression of the Cnr1 and Cnr1  $\Delta$ 417 mutant constructs
